# Supplementary material for: Impact of the COVID-19 Lockdown on Lifestyle Behaviors and their Association with Personality Among Adults in Qatar: A Cross-Sectional Study
Source: Preprints.org preprint supplement (doi:10.20944/preprints202104.0071.v1), 2021-04-02
Supplement: Supplementary file 1 [file supplementary]

**Table S1.** MEDAS Mean Score by Personality Types Before and During COVID-19 Lockdown.

| <b>MEDAS mean<br/>score</b> | <b>Agreeableness</b> | <b>Extraversion</b> | <b>Conscientiousness</b> | <b>Neuroticism</b> | <b>Openness</b> |
|-----------------------------|----------------------|---------------------|--------------------------|--------------------|-----------------|
| Before<br>Lockdown          | 5.9                  | 6.8                 | 6.6                      | 5.5                | 6.1             |
| During<br>Lockdown          | 5.9                  | 6.2                 | 6.4                      | 5.5                | 5.8             |
| Change<br>in Score          | -0.1                 | -0.6                | -0.2                     | 0.1                | -0.3            |

**Table S2:** Physical Activity Characteristics by Personality Traits before and During the COVID-19 Lockdown

| Personality Type  |                 |                |                           |                           |                          |                          |                          |                          |                          |                         |
|-------------------|-----------------|----------------|---------------------------|---------------------------|--------------------------|--------------------------|--------------------------|--------------------------|--------------------------|-------------------------|
| PA (MET values)   |                 | Agreeableness  | Extraversion              |                           | Conscientiousness        |                          | Neuroticism              |                          | Openness                 |                         |
|                   |                 |                | Model 1                   | Model 2 <sup>a</sup>      | Model 1                  | Model 2 <sup>a</sup>     | Model 1                  | Model 2 <sup>a</sup>     | Model 1                  | Model 2 <sup>a</sup>    |
| Vigorous Activity | Before Lockdown | Ref<br>(732.4) | 667.6<br>(-139.8, 1474.9) | 572.2<br>(-297.6, 1442.0) | 246.2<br>(-143.5, 635.9) | 146.9<br>(-266.9, 560.7) | -74.0<br>(-758.0, 610.1) | -127.3<br>(-805.3,550.8) | 159.4<br>(-156.2, 474.9) | 175.1<br>(-148.8,499)   |
|                   | P-value         |                | 0.105                     | 0.197                     | 0.215                    | 0.486                    | 0.832                    | 0.712                    | 0.321                    | 0.288                   |
|                   | During Lockdown | Ref<br>(626.9) | 389.8<br>(-120.9, 900.4)  | 314.8<br>(-205.0, 834.7)  | 129.9<br>(1-87.1, 446.9) | 128.8<br>(-233.5, 491.0) | -11.5<br>(-496.8,473.8)  | -54.1<br>(-573.8,465.7)  | 110.2<br>(-171.6,392.0)  | 153.9<br>(-147.8,455.5) |
|                   | P-value         |                | 0.134                     | 0.234                     | 0.421                    | 0.485                    | 0.963                    | 0.838                    | 0.442                    | 0.316                   |
| Moderate activity | Before Lockdown | Ref<br>(249.9) | 45.1<br>(-213.9,304.0)    | 23.3<br>(-244.1,290.7)    | -8.0<br>(-158.5,142.4)   | -25.7<br>(-184.1,132.7)  | 39.3<br>(-498.3,577.0)   | 33.0<br>(-508.4,574.4)   | 116.5<br>(-49.6,282.6)   | 145.4<br>(-20.4,311.3)  |
|                   | P-value         |                | 0.732                     | 0.864                     | 0.916                    | 0.750                    | 0.886                    | 0.905                    | 0.169                    | 0.085                   |
|                   | During Lockdown | Ref<br>(176.3) | 30.4<br>(-118.7,179.5)    | -5.8<br>(-148.0,136.3)    | 19.7<br>(-106.2,145.6)   | -16.0<br>(-148.7,116.8)  | 189.9<br>(-442.8,822.5)  | 167.9<br>(-469.4,805.2)  | 48.2<br>(-63.3,159.6)    | 55.8<br>(-56.2,167.8)   |
|                   | P-value         |                | 0.689                     | 0.936                     | 0.758                    | 0.813                    | 0.555                    | 0.605                    | 0.396                    | 0.328                   |

Model 1: Unadjusted

Model 2: Adjusted for gender, age, nationality, education, marital status, work status, BMI, smoking

Mean difference (95% CI) between each personality type and agreeableness (reference category)

\* indicates statistical significance at the 5% significance level using linear regression, <sup>a</sup> indicates means of reference category (agreeableness)

**Table S3.** Physical Activity Mean MET Values by Personality Traits before and During COVID-19 Lockdown.

|          | PA mean values<br>(MET) | Agreeableness | Extraversion | Conscientiousness | Neuroticism | Openness |
|----------|-------------------------|---------------|--------------|-------------------|-------------|----------|
| All PA   | Before Lockdown         | 1566.4        | 2121.3       | 1839.2            | 1343.7      | 2047.5   |
|          | After Lockdown          | 1114.5        | 1674.3       | 1410.2            | 1307.7      | 1426.3   |
| Moderate | Before Lockdown         | 249.9         | 295.0        | 241.9             | 289.2       | 366.4    |
|          | After Lockdown          | 176.3         | 206.7        | 196.0             | 366.2       | 224.5    |
| Vigorous | Before Lockdown         | 732.4         | 1400.0       | 978.7             | 658.5       | 891.8    |
|          | After Lockdown          | 626.9         | 1016.7       | 756.8             | 615.4       | 737.1    |
| Walking  | Before Lockdown         | 426.3         | 426.3        | 618.6             | 396.0       | 789.3    |
|          | After Lockdown          | 451.0         | 451.0        | 457.4             | 326.2       | 464.7    |
| Sitting  | Before Lockdown         | 2730.0        | 2730.0       | 3066.0            | 2520.0      | 2774.3   |
|          | After Lockdown          | 3570.0        | 3570.0       | 3939.6            | 3343.8      | 3791.4   |
